# Supplementary material
Source: Atypon-hosted journal article supplement (https://805.library.nashville.org/Record/CARL0001044020/DownloadSupplementalFile?fileId=179)
Supplement: DownloadSupplementalFile [file DownloadSupplementalFile]

**Nashville 2020-2021 Collection,  
inclusive dates: 2020-2022**

**Collection Summary**

**Creator:** Public Library of Nashville and Davidson County

**Title:** Nashville 2020-2021 Collection

**Inclusive Dates:** 2020-2022

**Summary/Abstract:** Materials, mostly from the Nashville Convention and Visitors Corp, documenting the impact of the COVID-19 pandemic on Nashville's local economy, particularly as it relates to the hospitality and tourism industry, including music performances, sporting events, restaurants, bars and hotels. Public health protocols, such as masking, social distancing, and capacity restrictions as they relate to these activities are also mentioned. Other major events of 2020-2021 are tangentially documented in the collection.

**Physical Description/Extent:** .8 cu. ft.

**Series:**

**Linking Entry Complexity Note:**

**Accession Number:** Acc. 2020.001; 2021.001; 2021.002

**Language:** In English.

**Stack Location:** West workroom range 2 section 2

**Repository:** Special Collections Division, Nashville Public Library, 615 Church St., Nashville, TN 37219

**Chronology**

- |                |                                                                                                                                                                                                                                                                                                                                                                                                                                                                                                                                                                                                                                                                                                           |
|----------------|-----------------------------------------------------------------------------------------------------------------------------------------------------------------------------------------------------------------------------------------------------------------------------------------------------------------------------------------------------------------------------------------------------------------------------------------------------------------------------------------------------------------------------------------------------------------------------------------------------------------------------------------------------------------------------------------------------------|
| 2020 Feb. 29   | Major League Soccer debuts in Nashville, with Nashville SC playing their inaugural game at Nissan Stadium.                                                                                                                                                                                                                                                                                                                                                                                                                                                                                                                                                                                                |
| 2020 Mar. 2-3  | Around midnight, a single long-track EF-3 tornado struck North Nashville, East Nashville, Donelson, Hermitage and elsewhere, part of a large "super-cell" outbreak across several states, spawning 7 different tornadoes in Middle Tennessee. The tornado that struck Nashville was about a half mile wide with peak winds of 165 mph, and tracked over 60 miles on the ground, the longest in Middle Tennessee since record-keeping began in 1950. It remained strong through Wilson County, causing extensive damage in Mt. Juliet, and subsided in Smith County. Two people in East Nashville died, and three people in Mt. Juliet were killed. A different tornado killed 19 people in Putnam County. |
| 2020 Mar. 5    | First confirmed COVID-19 case in Tennessee.                                                                                                                                                                                                                                                                                                                                                                                                                                                                                                                                                                                                                                                               |
| 2020 mid-March | The novel coronavirus, which would become known as COVID-19, was detected in Middle Tennessee. Within days and weeks, in a rapidly evolving situation and with guidance and initiatives at the federal, state, and local levels, day-to-day activities in Nashville and elsewhere were halted or severely curtailed. Businesses and schools were forced to close; government offices shut down; only "essential workers" were ordered to report for duty. It was a very                                                                                                                                                                                                                                   |

|               |                                                                                                                                                                                                                                                                                                                                                                                                                                                                                                                                                                                                                                                                                                                                                                                                                                                          |
|---------------|----------------------------------------------------------------------------------------------------------------------------------------------------------------------------------------------------------------------------------------------------------------------------------------------------------------------------------------------------------------------------------------------------------------------------------------------------------------------------------------------------------------------------------------------------------------------------------------------------------------------------------------------------------------------------------------------------------------------------------------------------------------------------------------------------------------------------------------------------------|
|               | fluid situation with new guidance and restrictions issued almost every day. Many businesses shut down in mid-March, anticipating being closed for just two weeks, in an effort to slow or contain the spread of this highly contagious, frequently deadly, new disease.                                                                                                                                                                                                                                                                                                                                                                                                                                                                                                                                                                                  |
| 2020 Mar. 8   | First recorded COVID-19 case in Nashville.                                                                                                                                                                                                                                                                                                                                                                                                                                                                                                                                                                                                                                                                                                                                                                                                               |
| 2020 Mar. 12  | Governor Bill Lee issues an executive order declaring a state of emergency in Tennessee due to the COVID-19 pandemic.                                                                                                                                                                                                                                                                                                                                                                                                                                                                                                                                                                                                                                                                                                                                    |
|               | The NCAA announces the cancellation of the annual "March Madness" college basketball tournament and all conference championships, including the SEC championship in Nashville.                                                                                                                                                                                                                                                                                                                                                                                                                                                                                                                                                                                                                                                                           |
| 2020 Mar. 18  | COVID-19 Response Fund established with the United Way of Greater Nashville to aid workers in the hospitality industry impacted by closures and business restrictions.                                                                                                                                                                                                                                                                                                                                                                                                                                                                                                                                                                                                                                                                                   |
| 2020 Mar. 20  | First recorded death in Nashville from COVID-19.                                                                                                                                                                                                                                                                                                                                                                                                                                                                                                                                                                                                                                                                                                                                                                                                         |
| 2020 Mar. 22  | After Metro Public Health Department declares a Health Emergency, the medical director issues a "Safer at Home Order," requiring all "non-essential employees" to stay home and indoors. Individuals are asked to practice "social distancing" if they must get out in to the community, staying at least six feet apart, wearing facemasks, and practicing good health hygiene such as frequent hand-washing and covering sneezes and coughs. Gatherings of more than 10 people are prohibited, thus restricting church services, social clubs, classes, and other types of group activities, even funerals and weddings. Although plans are developed for COVID-19 testing sites to open at several places across the city, lack of supplies such as nasal swabs, and "personal protective equipment" (PPE) for medical workers delay testing efforts. |
| 2020 Mar. 24  | The Nashville Convention and Visitors Corporation announces "Music City Bandwidth," an effort to keep musicians employed and performing - from their homes - by hosting "virtual concerts."                                                                                                                                                                                                                                                                                                                                                                                                                                                                                                                                                                                                                                                              |
| 2020 Mar. 31  | Announcement that CMA Fest, held in June, will be cancelled for 2020.                                                                                                                                                                                                                                                                                                                                                                                                                                                                                                                                                                                                                                                                                                                                                                                    |
| 2020 April    | Businesses, government offices, schools, and other entities remained closed. Schools began use of "remote learning" by video conference and most office workers began working from home rather than reporting to the office. Restaurants and bars were limited to take-out orders only, and special provision was made for carryout alcoholic beverage orders. Preparations begin at Music City Center convention center to set up 1600 beds for patients with mild COVID symptoms, should hospitals become overwhelmed.                                                                                                                                                                                                                                                                                                                                 |
| 2020 April 13 | Governor Bill Lee extends the State's stay-at-home order until the end of April.                                                                                                                                                                                                                                                                                                                                                                                                                                                                                                                                                                                                                                                                                                                                                                         |
|               | Music City Inc. Foundation provides financial assistance to hourly workers in the hospitality industry who have been laid off.                                                                                                                                                                                                                                                                                                                                                                                                                                                                                                                                                                                                                                                                                                                           |
| 2020 April 15 | Governor Bill Lee announces the closure of schools for the remainder of the school year.                                                                                                                                                                                                                                                                                                                                                                                                                                                                                                                                                                                                                                                                                                                                                                 |

|                |                                                                                                                                                                                                                                                                                                                                                                                                                                                                                                                                                                                                                                                                                                                                                                                                                                                                                                                                                                                                                                                            |
|----------------|------------------------------------------------------------------------------------------------------------------------------------------------------------------------------------------------------------------------------------------------------------------------------------------------------------------------------------------------------------------------------------------------------------------------------------------------------------------------------------------------------------------------------------------------------------------------------------------------------------------------------------------------------------------------------------------------------------------------------------------------------------------------------------------------------------------------------------------------------------------------------------------------------------------------------------------------------------------------------------------------------------------------------------------------------------|
| 2020 mid-April | A number and variety of philanthropic efforts are organized throughout the community to provide assistance and support to those experiencing hardship due to job loss and business closures or suspension of operations. Among those most impacted: musicians, restaurants and bars, hospitality workers in hotels, attractions, and the travel industry.                                                                                                                                                                                                                                                                                                                                                                                                                                                                                                                                                                                                                                                                                                  |
| 2020 April 30  | Mayor John Cooper announces the “Roadmap for Reopening” Nashville. It is a phased approach limiting what kinds of businesses can reopen, at what capacity, and what kinds of protective measures (such as required wearing of masks or “social distancing” requirements) must be in place. Which phase the city is in will depend on COVID-19 statistics from the Metro Health Department. In addition, Mayor Cooper imposes a longer “Stay-at-Home” order than that issued by Governor Lee, requiring Nashville residents to stay at home until May 8.                                                                                                                                                                                                                                                                                                                                                                                                                                                                                                    |
| 2020 May       | The Nashville tourist industry comes to a standstill as events, concerts, sports, conventions, and other large gatherings are cancelled. High schools host "virtual graduations" and "graduation parades," where students are driven past their school in family cars, to avoid gathering in large groups. Many businesses and offices remain closed, and many will not reopen at all for six months to a full year.                                                                                                                                                                                                                                                                                                                                                                                                                                                                                                                                                                                                                                       |
| 2020 May 11    | Mayor Cooper announces Nashville will move in to Phase 1 of reopening. Restaurants and retail may reopen at half capacity.                                                                                                                                                                                                                                                                                                                                                                                                                                                                                                                                                                                                                                                                                                                                                                                                                                                                                                                                 |
| 2020 May 25    | Nashville moves in to Phase 2 of reopening.                                                                                                                                                                                                                                                                                                                                                                                                                                                                                                                                                                                                                                                                                                                                                                                                                                                                                                                                                                                                                |
| 2020 May 28    | Nashville Convention and Visitors Corporation announces the “Good to Go” campaign, asking businesses to pledge to adhere to public health guidelines, such as masking and social distancing, to ensure a safe and successful reopening.                                                                                                                                                                                                                                                                                                                                                                                                                                                                                                                                                                                                                                                                                                                                                                                                                    |
| 2020 May 30    | At 3:30 p.m. a large crowd of approximately 4,000 people gather at Legislative Plaza as part of a protest against racism and police brutality. The protest was prompted by nationwide outrage over the murder of George Floyd, an African American man, in Minneapolis on May 25 by a white police officer. The deaths of two black men in Nashville, Jocke Clemmons and Daniel Hambrick, also killed by white police officers a few years earlier, also formed a backdrop for the local protest. Originally a large but peaceful gathering, tensions escalate later in the afternoon, becoming violent in the early evening, with windows broken and a fire set inside the Metro Courthouse. Mayor Cooper declares a state of civil emergency, imposes a 10:00 p.m. curfew, and Governor Bill Lee activates the National Guard. Police use tear gas on protestors at Public Square in an effort to break up the crowd. Instances of vandalism, mostly in the form of graffiti and breaking of windows, occur at several locations downtown. The statue of |

|                |                                                                                                                                                                                                                                                                                                                                                                                                                                                                         |
|----------------|-------------------------------------------------------------------------------------------------------------------------------------------------------------------------------------------------------------------------------------------------------------------------------------------------------------------------------------------------------------------------------------------------------------------------------------------------------------------------|
|                | Edward Ward Carmack, which overlooked Legislative Plaza, is torn down.                                                                                                                                                                                                                                                                                                                                                                                                  |
| 2020 June      | Concerts small and large begin to take place outdoors in a “drive-in” format, with attendees remaining in their cars in a parking lot. Church services frequently are held in the same manner.                                                                                                                                                                                                                                                                          |
| 2020 June 4    | An estimated crowd of 10,000 people gather in downtown Nashville for a peaceful protest against racism and police brutality. The protest was initiated by six teenage girls, who formed “Teens 4 Equality” just a few weeks earlier, and partnered with the larger Black Lives Matter movement. The protest remained peaceful, and the young women and Nashville gained national attention as an example of how to have an effective, but peaceful, mass demonstration. |
| 2020 June 13   | “March for Justice” in Nashville                                                                                                                                                                                                                                                                                                                                                                                                                                        |
| 2020 June 22   | Nashville moves in to Phase 3 reopening. Restaurants and retail can function at 75% capacity; others at half capacity.                                                                                                                                                                                                                                                                                                                                                  |
| 2020 June 25   | In less than a month, more than 600 businesses have signed up to be part of the “Good to Go” campaign, indicating their commitment to COVID-19 safety protocols.                                                                                                                                                                                                                                                                                                        |
| 2020 June 29   | Wearing masks in public is required in Nashville. Violators may be charged with a Class C misdemeanor.                                                                                                                                                                                                                                                                                                                                                                  |
| 2020 July      | Vanderbilt University Medical Center begins early stage clinical trials for the Moderna COVID-19 vaccine.                                                                                                                                                                                                                                                                                                                                                               |
| 2020 July 3    | Nashville returns to Phase 2 due to a surge in COVID cases. Bars are closed completely for 14 days.                                                                                                                                                                                                                                                                                                                                                                     |
| 2020 July 4    | The annual “Let Freedom Sing!” fireworks show and musical celebration, typically one of the largest Fourth of July gatherings in the nation, is scaled back to a one hour television program, with no fireworks. No in-person celebration will be held.                                                                                                                                                                                                                 |
| 2020 July 14   | Police begin active enforcement of Nashville’s mask mandate, especially in areas of Davidson County identified as “hot spots.” One of these areas is the downtown core.                                                                                                                                                                                                                                                                                                 |
| 2020 July 28   | The Nashville Convention and Visitors Corporation issues compiled data about losses in visitor spending and business income. Since March, Nashville has experienced \$2 billion in lost visitor spending.                                                                                                                                                                                                                                                               |
| 2020 July-Aug. | Early voting begins in the general election. Challenges arise from the pandemic such as increased and special circumstances for mail-in and absentee ballots, efforts to make touch-screen voting "touch free," masking and social distancing.                                                                                                                                                                                                                          |
| 2020 Aug. 18   | Mayor Cooper announces that Tennessee Titans and Nashville SC games at Nissan Stadium will take place, but without fans in the stands.                                                                                                                                                                                                                                                                                                                                  |
| 2020 Sept. 7   | The scheduled opening on Labor Day of the new National Museum of African American Music in Nashville is postponed.                                                                                                                                                                                                                                                                                                                                                      |

|                 |                                                                                                                                                                                                                                                                                                                                                                                                                                                                                                                                                                                                                                                                                    |
|-----------------|------------------------------------------------------------------------------------------------------------------------------------------------------------------------------------------------------------------------------------------------------------------------------------------------------------------------------------------------------------------------------------------------------------------------------------------------------------------------------------------------------------------------------------------------------------------------------------------------------------------------------------------------------------------------------------|
| 2020 Sept. 15   | Nashville Convention and Visitors Corporation (NCVC) promotes "Love Thy Neighborhoods" - an effort to encourage support and shopping at small local businesses.<br>NCVC reports that Nashville is losing \$100 million a week in visitor spending.                                                                                                                                                                                                                                                                                                                                                                                                                                 |
| 2020 Sept. 16   | The Academy of Country Music Awards is held in Nashville for the first time, ever.                                                                                                                                                                                                                                                                                                                                                                                                                                                                                                                                                                                                 |
| 2020 Sept.-Oct. | More "Music City Bandwidth" concerts take place online and via streaming services.                                                                                                                                                                                                                                                                                                                                                                                                                                                                                                                                                                                                 |
| 2020 late Sept. | "Downtown Details" announces that only 21 new businesses have opened in downtown Nashville since the pandemic began.                                                                                                                                                                                                                                                                                                                                                                                                                                                                                                                                                               |
| 2020 Oct.       | Mayor Cooper announces that a limited number of fans - between 10% and 15% capacity - will be allowed at Nissan Stadium for Tennessee Titans games.                                                                                                                                                                                                                                                                                                                                                                                                                                                                                                                                |
| 2020 Oct. 1     | Nashville returns to Phase 3 of reopening.                                                                                                                                                                                                                                                                                                                                                                                                                                                                                                                                                                                                                                         |
| 2020 Oct. 1-11  | The annual Southern Festival of Books moves to an online-only format, spread out over more than one week.                                                                                                                                                                                                                                                                                                                                                                                                                                                                                                                                                                          |
| 2020 Oct.-Nov.  | Voting takes place for the federal and state general election.                                                                                                                                                                                                                                                                                                                                                                                                                                                                                                                                                                                                                     |
| 2020 Oct. 29    | Vanderbilt issues a Health Policy Study.                                                                                                                                                                                                                                                                                                                                                                                                                                                                                                                                                                                                                                           |
| 2020 Nov.       | The annual Rock n Roll Marathon is cancelled, due to a surge in COVID cases, just prior to the Thanksgiving holidays.                                                                                                                                                                                                                                                                                                                                                                                                                                                                                                                                                              |
| 2020 Dec. 14    | Over 1300 new COVID-19 cases in Nashville are detected in a single day.                                                                                                                                                                                                                                                                                                                                                                                                                                                                                                                                                                                                            |
| 2020 Dec. 16    | First vaccinations begin in Tennessee, with initial rollout focusing upon healthcare workers and first responders.                                                                                                                                                                                                                                                                                                                                                                                                                                                                                                                                                                 |
| 2020 Dec. 22    | Nashville spikes as the nation's top COVID-19 "hotspot" due to an increase in cases. Tennessee becomes a "global hotspot" due to transmission rates.                                                                                                                                                                                                                                                                                                                                                                                                                                                                                                                               |
| 2020 Dec. 25    | Around 6:30 a.m. an RV loaded with explosives detonates in front of the AT&T switching station at 185 Second Avenue North in an event known locally as the "Christmas Day Bombing." Thanks to the actions of six Metro police officers, people are evacuated safely. Telecommunications affecting internet access, banking systems, business operations, and phone calls - including 911 emergency operations - were disrupted across multiple states, many not being restored for two to three days. More than 40 structures on Second Avenue and nearby are seriously damaged; windows are blown out elsewhere around the downtown area. The rebuilding process will take years. |
| 2020 late Dec.  | Entrepreneur and philanthropist Marcus Lemonis initiates the "Nashville 30 Day Fund," offering forgivable loans to individuals and businesses impacted by the Christmas Day bombing.                                                                                                                                                                                                                                                                                                                                                                                                                                                                                               |
| 2020 Dec. 30-31 | Both the Music City Bowl football game and the large New Year's Eve celebration are cancelled. A Metro Public Health order requires bars to stop serving alcohol at 10pm, and to close at 11pm                                                                                                                                                                                                                                                                                                                                                                                                                                                                                     |

|                 |                                                                                                                                                                                                                                                                                                                             |
|-----------------|-----------------------------------------------------------------------------------------------------------------------------------------------------------------------------------------------------------------------------------------------------------------------------------------------------------------------------|
|                 | on New Year's Eve. Several concerts take place online as alternate options to large gatherings.                                                                                                                                                                                                                             |
| 2021 Jan.       | The National Museum of African American Music (NMAAM) opens in downtown Nashville. Due to the continuing pandemic, the museum initially opens only on weekends and with limited visitor capacity.<br>Nashville Predators host their home opener for the season - but no fans are allowed in the stands.                     |
| 2021 Feb.       | Nashville becomes one of only two U.S. cities to be designated as a "Safe Travels" location by the World Travel and Tourism Council                                                                                                                                                                                         |
| 2021 Feb. 1     | Music City Center opens as a mass vaccination site, with a goal of vaccinating 1000 people a day.                                                                                                                                                                                                                           |
| 2021 Mar. 4     | Fifth + Broadway, a major shopping and food venue, opens in downtown.                                                                                                                                                                                                                                                       |
| 2021 Mar. 10    | 15% of Nashvillians are vaccinated.                                                                                                                                                                                                                                                                                         |
| 2021 Mar. 10-14 | SEC men's basketball tournament at Bridgestone Arena. Crowds limited to 25% of capacity.                                                                                                                                                                                                                                    |
| 2021 Mar. 20    | Mass vaccination event held at Nissan Stadium. Drive-thru vaccines offered with goal of 10,000 people vaccinated.                                                                                                                                                                                                           |
| 2021 Mar. 26    | 2nd Avenue Strong benefit concert broadcast and livestreamed to raise funds for Second Avenue businesses impacted by Christmas Day bombing.                                                                                                                                                                                 |
| 2021 Mar. 27    | Approximately 20% of Nashvillians have been vaccinated. Predictions are that by July 1 40% will be vaccinated.                                                                                                                                                                                                              |
| 2021 April      | St. Jude Rock n Roll Marathon postponed until the fall; announcement made that Nashville will resume hosting its annual July 4 celebration                                                                                                                                                                                  |
| 2021 April 1    | Vaccines now become available to the general public at large, age 16 and over. Prior to this time, vaccines were offered to various groups based upon their risk (occupation, age, health conditions, etc.)                                                                                                                 |
| 2021 April 9    | Masks no longer required to be worn outdoors                                                                                                                                                                                                                                                                                |
| 2021 April 18   | Academy of Country Music Awards broadcast from the Ryman Auditorium, Grand Ole Opry, and Bluebird Café                                                                                                                                                                                                                      |
| 2021 May 14     | All COVID capacity restrictions at events and venues are lifted, but masks are still required indoors. Fourteen months after the pandemic came to Nashville, Butch Spyridon of the Nashville Convention and Visitors Corp issues his last formal pandemic-related update.                                                   |
| 2021 June 15-16 | The Southern Baptist Convention meets in Nashville at the Music City Center. It is the first major convention to occur since the pandemic began. Normally drawing about 12,000 attendees, this year's crowd is expected to be around 23,000 people. Hotel, restaurant, and hospitality locations are advised to prepare and |

|                 |                                                                                                                                                                                                                                                                                  |
|-----------------|----------------------------------------------------------------------------------------------------------------------------------------------------------------------------------------------------------------------------------------------------------------------------------|
|                 | increase their staffs appropriately, after a significantly reduced workforce during the pandemic.                                                                                                                                                                                |
| 2021 July 4     | “Let Freedom Sing” Fourth of July celebration becomes the first major event after reopening the city. It is billed as being the largest fireworks show ever held in Nashville.                                                                                                   |
| 2021 early Aug. | The number of COVID-19 cases begin to show a sharp rise due to the “Delta variant”. Nashville’s vaccination rate is 53%.                                                                                                                                                         |
| 2021 Aug. 6-8   | First-ever Music City Grand Prix Indy-car race happens on the streets of downtown Nashville                                                                                                                                                                                      |
| 2021 Sept. 5    | The first FIFA World Cup qualifying match for the 2022 World Cup occurs at Nissan Stadium, where the U.S. Men’s Team takes on Canada.                                                                                                                                            |
| 2021 Nov.       | Governor Lee's state of emergency declaration is allowed to expire. This effectively means that Mayor John Cooper and the Metro Health Department can no longer issue or enforce a mask mandate in Nashville.                                                                    |
| 2021 Dec.       | Downtown Partnership announces that 95 new businesses opened in downtown during 2021 - the most ever.                                                                                                                                                                            |
| 2021 Dec. 8     | Mayor John Cooper unveils the Second Avenue Recovery Plan to build back after the damage caused by Christmas Day bombing.                                                                                                                                                        |
| 2021 late Dec.  | First and Second Avenues reopen to limited vehicular traffic for the first time since the bombing.                                                                                                                                                                               |
| 2021 Dec. 31    | “Nashville’s Big Bash” New Year’s Eve celebration held at Bicentennial Mall, drawing approximately 200,000 people. Attendees must show proof of a negative COVID test or proof of vaccination in order to be admitted. The event is broadcast as a five-hour television special. |

### **Biographical/Historical Sketch**

In mid-March 2020, the Nashville Public Library along with other offices of Metro Government, and like many businesses and office buildings, shut its doors. Staff were sent home for what was anticipated to be a two-week closure. Limited numbers of staff returned to work about a month later to provide “curbside service” of books for pickup by patrons, but many staff, including the Special Collections Division, pivoted to working remotely using their personal computers to work from home. Special Collections staff did not return to the building until October 2020. The Library would not reopen to public visitors until March 2021, a year after its initial closure.

Due to the closure of the Library, other closures throughout the city, COVID restrictions and health protocols, as well as the proliferation of digital-only content, very little could be done by Special Collections staff to actively document the coronavirus pandemic while it was happening. Much of collecting efforts were done after-the-fact, or were created by printing out emails, newsletters, and other electronically delivered documents that were already being sent to staff. Such materials form the basis for this collection.

Other major events during 2020, such as the March tornado, the racial justice protests during the summer, and the 2nd Avenue Bombing on Christmas Day, were similarly minimally documented by Special Collections staff, due to the same types of restrictions: limited access to the Library building; COVID protocols; rapidly unfolding events; “born-digital” and ephemeral digital content; and inability to access sites of events due to public safety restrictions.

Therefore, the materials in this collection are not to be considered comprehensive in any way. However, they do serve to document a snapshot in time and provide more information than would otherwise be available, particularly as it relates to the coronavirus pandemic, public health, and their impacts on the business and tourism community of Nashville, particularly the downtown entertainment district.

### **Scope and Contents of the Collection**

This artificially assembled collection was created by Special Collections Division staff of the Nashville Public Library in an effort to document the experience of Nashville during the COVID-19 pandemic. Most of the collection consists of printed emails from Butch Spyridon, CEO of the Nashville Convention and Visitors Corp., (NCVC) and printed electronic newsletters from both NCVC and Nashville Downtown Partnership. These materials document the sudden and unexpected appearance of the coronavirus, and its short and long-term impacts upon Nashville’s major businesses, with emphasis upon the downtown core, and in particular, the hospitality and tourism industry, including hotels, restaurants, bars, music venues, and country music performances, as well as major sporting events and other special events. Also included is how many of these same businesses sought creative ways of maintaining their business activities despite restrictions and prohibitions imposed upon them by the pandemic. Such innovations included outdoor “drive-in” concerts where audience members remained in their cars; live-stream “virtual” concerts; sporting events without fans; the increase in to-go food and drink orders (including liquor to go); the promotion of gift certificate purchases with hotels and other venues as a way to continue a revenue stream despite closures or travel hesitancy; charitable activities to aid musicians, hospitality workers, bartenders, and others; and much more. Statistics, economic numbers, revenue, and other data demonstrating the impact of the pandemic are also included throughout the collection, including periodic “surges” in illness prompting a resumption of public health restrictions. Other items in the collection include newsletters or brochures from individual businesses or organizations, sharing their experiences and challenges with the pandemic. Collectively, the materials in this collection document the unusual and unexpected connections between public health and the hospitality industry, as well as the significant economic impact the pandemic had on Nashville.

One key aspect documented in materials from NCVC is the effort to sustain and build demand for Nashville’s products (tourism, festivals, events) even though many events had been cancelled. This was a deliberate strategy undertaken by NCVC to ensure that once the pandemic had subsided and/or restrictions had been lifted, Nashville would be



front-of-mind for those seeking to take a vacation or book a convention. Part of their efforts in this area were an emphasis upon public health and safety within the hospitality community, signified by the “Good to Go” pledge, indicating a business that was committed to practicing COVID safety protocols. When vaccinations against the coronavirus became available to the general public early in 2021, NCVC strongly supported vaccination efforts. They saw increased vaccination rates as a way to more quickly bring about a strong and sustained economic recovery and to speed up Nashville’s reopening efforts.

Although the coronavirus pandemic is the central focus of this collection, numerous other events in 2020 and 2021 would prove equally important to document but appear in this collection only incidentally as they impacted downtown businesses. Some of these topics include: the March 2020 tornado; the summer of 2020 calls for racial justice, and how those protests, both peaceful and turbulent, unfolded in Nashville; holding a metropolitan election during a worldwide pandemic during the fall of 2020; and the Second Avenue bombing on Christmas Day, 2020.

Very few items in this collection originate from the mayor’s office, the Public Health department, or other offices of Metro government, as these materials will likely one day be available through Metro Archives. The few items that are included in the collection are incidental, such as a proclamation or note of thanks from the mayor to Metro employees. However, actions of Metro government and the Mayor’s office, as well as Public Health, may still be documented through some of the newsletters or other items within the collection, particularly as NCVC was advising its members about the latest COVID protocols, restrictions, and numbers.

Similarly, although students, faculty, and administrators at both Meharry Medical College and Vanderbilt University were deeply involved in fighting the pandemic both locally and nationally, with Dr. James Hildreth of Meharry and Dr. William Schaffner of Vanderbilt frequently receiving national attention, very little about these institutions will be found in this collection.

### **Organization/Arrangement of Materials**

The collection is arranged chronologically by year and month.

### **Restrictions**

**Restrictions on Access:** In library use only. Available by appointment. Personal contact information of individuals who sent thank you notes to the Nashville Convention and Visitors Corp has been redacted by Special Collections Division staff in order to maintain privacy. A photocopy with redactions was placed in the publicly-accessible research collection. Original submissions containing this information reside in the NCVC donor file and are closed to the public, as a policy of the Special Collections Division of the Nashville Public Library.

**Restrictions on Use and Reproduction:**

The Nashville Public Library does not have intellectual property rights to these materials.

**Index Terms****Personal Names:**

Cooper, John, 1956-  
Spyridon, Butch

**Corporate Names/Organizations:**

Nashville and Davidson County (Tenn.). Metropolitan Public Health Department  
Nashville and Davidson County (Tenn.). Mayor's Office  
Nashville Convention & Visitors Corp  
Nashville Downtown Partnership

**Subjects:**

Adaptability (Psychology)--Social aspects  
Bars (Drinking establishments) --Tennessee--Nashville  
Bombings--Tennessee--Nashville  
Business enterprises--Tennessee--Nashville  
Central business districts--Tennessee--Nashville  
Charities--Tennessee--Nashville  
Christmas Day Bombing, Nashville, Tenn., 2020  
City promotion--Tennessee--Nashville  
Concerts--Tennessee--Nashville  
COVID-19 Pandemic, 2020--Economic aspects--Tennessee  
COVID-19 Pandemic, 2020--Social aspects--Tennessee--Nashville  
Creative ability in business  
Holidays--Tennessee--Nashville  
Hospitality industry--Employees  
Hospitality industry--Tennessee--Nashville  
Hotels--Tennessee--Nashville  
Local elections--Tennessee--Nashville  
Local government--Law and legislation  
Marketing--Social aspects  
Music trade--Tennessee--Nashville  
Musicians--Tennessee--Nashville  
Organizational resilience  
Place marketing--United States  
Public health--Citizen participation  
Public health--Tennessee--Nashville  
Public safety--Tennessee--Nashville  
Restaurants--Tennessee--Nashville  
Social service--Tennessee--Nashville  
Special events--Tennessee--Nashville  
Sports--Marketing--Social aspects

Sports--Tennessee--Nashville  
Tornadoes--Tennessee--Nashville  
Tourism--Tennessee--Nashville  
Uncertainty--Economic aspects  
Voluntarism--Tennessee--Nashville

**Places:**

Broadway Avenue (Nashville, Tenn.)  
Nashville (Tenn.)--Tornado, 2020  
Nashville (Tenn.)--Commerce  
Nashville (Tenn.)--Economic conditions--21st century  
Nashville (Tenn.)--History--21st century--Sources  
Nashville (Tenn.)--Officials and employees  
Nashville (Tenn.)--Politics and government  
Nashville (Tenn.)--Social conditions--21st century  
Second Avenue (Nashville, Tenn.)

**Genre/Document Types:**

Annual reports  
Electronic mail  
Newsletters  
Reports

**Occupations:**

Musicians  
Restaurateurs

**Added Author (Personal):**

Spyridon, Butch

**Added Author (Corporate):**

Nashville Convention & Visitors Corp  
Nashville Downtown Partnership

**Added Title:**

Downtown Details

**Associated and Related Material**

Related Materials: Digital photographs taken of 2<sup>nd</sup> Avenue buildings damaged by the Christmas Day bombing can be found in the Special Collections Second Avenue Bomb Damage Photographs collection.

**Separated Material**

**Administrative Information**

**Additional Physical Form Available:**

**Location of Originals/Duplicates:**

**Copyright:** This material may be protected by copyright law (Title 17 U.S. Code). Nashville Public Library does not own intellectual property rights to these materials.

**Preferred Citation:** [Item description], [Folder title, including date], Nashville 2020-2021 Collection, Special Collections Division, Nashville Public Library.

**Immediate Source of Acquisition:** Majority of items created or distributed by the Nashville Convention and Visitors Corp acquired by gift from NCVC, 2021. Most other items received by or obtained via "staff pickup" by Special Collections Division staff.

**Ownership and Custodial History:** Intentionally assembled by staff of the Special Collections Division.

**Processing Information:** Printouts of emails and newsletters 2021-2022. Physical processing of collection by staff member Linda Barnickel, 2024.

**Accruals:** No further accruals are expected.

**Other Finding Aids****Electronic Location and Access**

Some reports or other electronically published documents may be available online. Items may be available at the originating agency or organization's website (such as <https://www.visitmusiccity.com/> for NCVC) or in some cases, resources may be available through the Internet Archive.

**References to Works by or about Collection Creator/Topic**

Jahangir, Alex. *Hot Spot: A Doctor's Diary from the Pandemic*. (Nashville: Vanderbilt University Press, 2022).

Underwood, Ryan. *A Year Like No Other: How a Global Pandemic Led to Vanderbilt University's Proudest Moment*. ([Nashville:] Forefront Books, [2021]).

A small portion of Cynthia Maddux's autobiography contains some content about her experience during the COVID-19 pandemic, part of the Cynthia Maddux Papers in the Special Collections Division of the Nashville Public Library.

**Detailed Description of the Collection****BOX 1 - 2020**

| Box/Folder | Date       | Contents                                                                                                         |
|------------|------------|------------------------------------------------------------------------------------------------------------------|
| B1 f.1     | 2020 March | (separation notice only. Refer to:)<br>Drawer K-5 Folder 10: <i>Nashville Scene</i> , Mar. 12-18, 2020 - Tornado |
| B1 f.2     | 2020 March | Nashville Convention and Visitors Corp. (NCVC) -<br>Updates from Butch Spyridon, President & CEO                 |
| B1 f.3     | 2020 April | NCVC - Updates from Butch Spyridon                                                                               |
| B1 f.4     | 2020 May   | NCVC - Updates from Butch Spyridon                                                                               |
| B1 f.5     | 2020 May   | NCVC "Recipe Notes" recipe book from Nashville restaurants                                                       |

|         |               |                                                                                                                                                                                                          |
|---------|---------------|----------------------------------------------------------------------------------------------------------------------------------------------------------------------------------------------------------|
| B1 f.6  | 2020 May      | News articles regarding protests of May 30                                                                                                                                                               |
| B1 f.7  | 2020 May/June | Thank you notes to NCVC from laid off hospitality workers who were provided financial assistance by Music City Inc. Foundation during restaurant and venue closures                                      |
| B1 f.8  | 2020 June     | "Good to Go" campaign (NCVC) Description [and list of participating businesses from Oct. 2020, "committed to health and safety" and practicing COVID protocols such as masking, social distancing, etc.] |
| B1 f.9  | 2020 June     | "Good to Go" campaign (NCVC) - Kit and signage                                                                                                                                                           |
| B1 f.10 | 2020 June     | "Good to Go" campaign (NCVC) - Stickers                                                                                                                                                                  |
| B1 f.11 | 2020 June     | NCVC - Updates from Butch Spyridon                                                                                                                                                                       |
| B1 f.12 | 2020 June     | Downtown Partnership "Downtown Details" newsletter [begins June 17]                                                                                                                                      |
| B1 f.13 | 2020 July     | NCVC - Updates from Butch Spyridon                                                                                                                                                                       |
| B1 f.14 | 2020 July     | Downtown Partnership "Downtown Details" newsletter                                                                                                                                                       |
| B1 f.15 | 2020 Summer   | NCVC Annual Report for fiscal year 2019-2020                                                                                                                                                             |
| B1 f.16 | 2020 Summer   | Elections in Davidson County                                                                                                                                                                             |
| B1 f.17 | 2020 Summer   | Various community mailers and handouts                                                                                                                                                                   |
| B1 f.18 | 2020 Aug.     | Centers for Disease Control (CDC) recommendations                                                                                                                                                        |
| B1 f.19 | 2020 Aug.     | NCVC - Updates from Butch Spyridon                                                                                                                                                                       |
| B1 f.20 | 2020 Aug.     | Downtown Partnership "Downtown Details" newsletter                                                                                                                                                       |
| B1 f.21 | 2020 Sept.    | NCVC - Updates from Butch Spyridon                                                                                                                                                                       |
| B1 f.22 | 2020 Sept.    | NCVC press releases: "Music City Bandwidth" and "Love Thy Neighborhoods"                                                                                                                                 |
| B1 f.23 | 2020 Sept.    | NCVC "Music City Bandwidth" deliverables catalog                                                                                                                                                         |
| B1 f.24 | 2020 Sept.    | Downtown Partnership "Downtown Details" newsletter                                                                                                                                                       |
| B1 f.25 | 2020 Oct.     | Tennessee Performing Arts Center (TPAC) booklet, 2020-21 season                                                                                                                                          |
| B1 f.26 | 2020 Oct.     | Elections in Davidson County                                                                                                                                                                             |
| B1 f.27 | 2020 Oct.     | NCVC - Updates from Butch Spyridon                                                                                                                                                                       |
| B1 f.28 | 2020 Oct.     | Downtown Partnership "Downtown Details" newsletter                                                                                                                                                       |
| B1 f.29 | 2020 Nov.     | NCVC - Updates from Butch Spyridon                                                                                                                                                                       |
| B1 f.30 | 2020 Nov.     | Downtown Partnership "Downtown Details" newsletter                                                                                                                                                       |
| B1 f.31 | 2020 Dec.     | NCVC - Updates from Butch Spyridon                                                                                                                                                                       |
| B1 f.32 | 2020 Dec.     | NCVC newsletter                                                                                                                                                                                          |
| B1 f.33 | 2020 Dec.     | Downtown Partnership "Downtown Details" newsletter                                                                                                                                                       |
| B1 f.34 | 2020 Dec.     | Library communications about 2nd Avenue bombing impacts                                                                                                                                                  |

## **BOX 2 - 2021-2022**

|        |            |                                                                                                                    |
|--------|------------|--------------------------------------------------------------------------------------------------------------------|
| B2 f.1 | 2021 Jan.  | Message from NPL Library Director and American Library Assn. (ALA) regarding attack on U.S. Capitol (Jan. 6, 2021) |
| B2 f.2 | 2021 Jan.  | NCVC - Updates from Butch Spyridon                                                                                 |
| B2 f.3 | 2021 Jan.  | NCVC newsletters                                                                                                   |
| B2 f.4 | 2021 Jan.  | Downtown Partnership "Downtown Details" newsletter                                                                 |
| B2 f.5 | 2021 Feb.  | NCVC - Updates from Butch Spyridon                                                                                 |
| B2 f.6 | 2021 Feb.  | NCVC newsletters                                                                                                   |
| B2 f.7 | 2021 Feb.  | Downtown Partnership "Downtown Details" newsletter                                                                 |
| B2 f.8 | 2021 March | Mayor Cooper vaccination email                                                                                     |

|         |             |                                                                                                                                                                                                                                                                        |
|---------|-------------|------------------------------------------------------------------------------------------------------------------------------------------------------------------------------------------------------------------------------------------------------------------------|
| B2 f.9  | 2021 March  | County COVID-19 Impact Planning Report (from U.S. Census)                                                                                                                                                                                                              |
| B2 f.10 | 2021 March  | NCVC - Updates from Butch Spyridon                                                                                                                                                                                                                                     |
| B2 f.11 | 2021 March  | NCVC newsletters                                                                                                                                                                                                                                                       |
| B2 f.12 | 2021 March  | Downtown Partnership "Downtown Details" newsletter                                                                                                                                                                                                                     |
| B2 f.13 | 2021 Spring | Community mailer: "Quality Tree Surgery" ("Nashville Strong")                                                                                                                                                                                                          |
| B2 f.14 | 2021 April  | NCVC - Updates from Butch Spyridon                                                                                                                                                                                                                                     |
| B2 f.15 | 2021 April  | NCVC newsletters                                                                                                                                                                                                                                                       |
| B2 f.16 | 2021 April  | Downtown Partnership "Downtown Details" newsletter                                                                                                                                                                                                                     |
| B2 f.17 | 2021 May    | NCVC - Update from Butch Spyridon (final)                                                                                                                                                                                                                              |
| B2 f.18 | 2021 May    | NCVC newsletters                                                                                                                                                                                                                                                       |
| B2 f.19 | 2021 May    | Downtown Partnership "Downtown Details" newsletter                                                                                                                                                                                                                     |
| B2 f.20 | 2021 June   | NCVC newsletters & announcements                                                                                                                                                                                                                                       |
| B2 f.21 | 2021 June   | Downtown Partnership "Downtown Details" newsletter                                                                                                                                                                                                                     |
| B2 f.22 | 2021 July   | Metro Historic Zoning Commission meeting - 2nd Avenue                                                                                                                                                                                                                  |
| B2 f.23 | 2021 July   | Downtown Partnership "Downtown Details" newsletter                                                                                                                                                                                                                     |
| B2 f.24 | 2021 Summer | NCVC Annual Report for fiscal year 2020-2021                                                                                                                                                                                                                           |
| B2 f.25 | 2021 August | NCVC - Updates from Butch Spyridon                                                                                                                                                                                                                                     |
| B2 f.26 | 2021 August | Downtown Partnership "Downtown Details" newsletter                                                                                                                                                                                                                     |
| B2 f.27 | 2021 Sept.  | Downtown Partnership "Downtown Details" newsletter                                                                                                                                                                                                                     |
| B2 f.28 | 2021 Oct.   | Downtown Partnership "Downtown Details" newsletter                                                                                                                                                                                                                     |
| B2 f.29 | 2021 Nov.   | NCVC - Updates from Butch Spyridon                                                                                                                                                                                                                                     |
| B2 f.30 | 2021 Nov.   | Downtown Partnership "Downtown Details" newsletter                                                                                                                                                                                                                     |
| B2 f.31 | 2021 Dec.   | Second Ave. Recovery Plan (Mayor's Office)                                                                                                                                                                                                                             |
| B2 f.32 | 2021 Dec.   | NCVC - Updates from Butch Spyridon                                                                                                                                                                                                                                     |
| B2 f.33 | 2021 Dec.   | Downtown Partnership "Downtown Details" newsletter                                                                                                                                                                                                                     |
| B2 f.34 | 2021 Dec.   | Mayor Cooper, thanks to Metro employees (Dec. 23, 2021)                                                                                                                                                                                                                |
| B2 f.35 | 2022 Jan.   | Downtown Partnership "Downtown Details" newsletter                                                                                                                                                                                                                     |
| B2 f.36 | 2022 June   | "Communications Dependencies Case Study - Nashville 'Christmas Day' Bombing," produced by Safecom, National Council of Statewide Interoperability Coordinators (NCSWIC), Cybersecurity and Infrastructure Security Agency (CISA), U.S. Department of Homeland Security |
